# Supplementary material for: The Spatial Dynamics of Dengue Virus in Kamphaeng Phet, Thailand
Source: PubMed Central journal article supplement (PMC4161352; doi:10.1371/journal.pntd.0003138), 2014-09-11

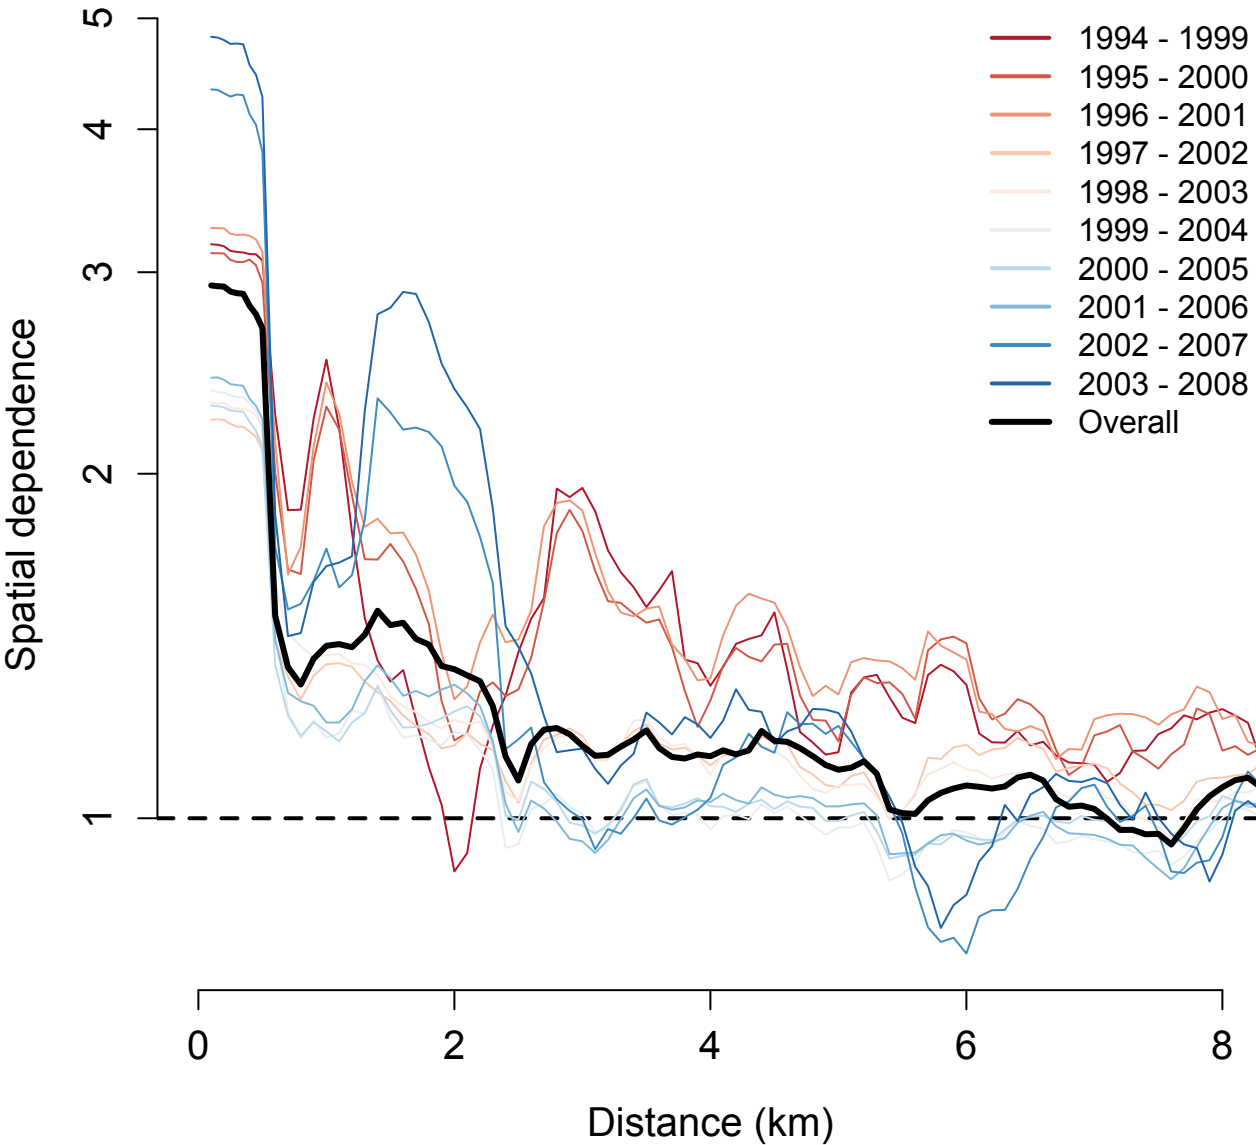

Supplement: pntd.0003138.s002.pdf [file pntd.0003138.s002.pdf]
